# Supplementary material for: Antibacterial Property and Cytotoxicity of a Poly(lactic acid)/Nanosilver-Doped Multiwall Carbon Nanotube Nanocomposite
Source: PubMed Central journal article supplement (PMC6431862; doi:10.3390/polym9030100), 2017-03-10
Supplement: polymers-09-00100-s001.pdf [file polymers-09-00100-s001.pdf]

## Supplementary materials

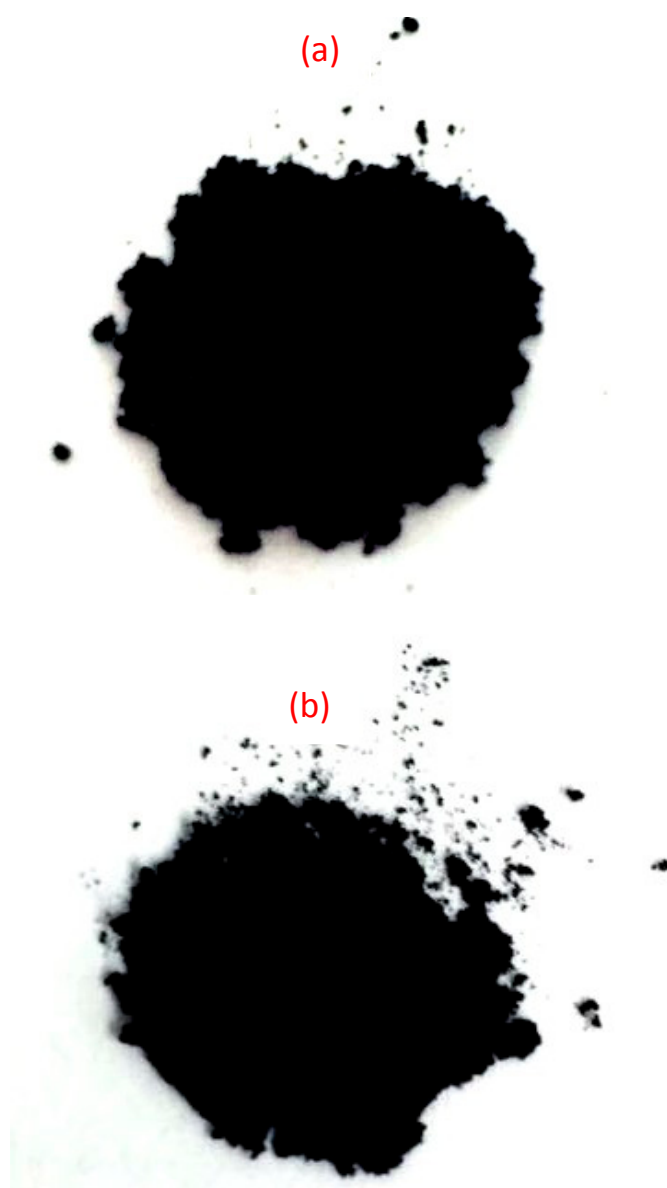

Figure S1. The appearance of (a) MWCNT and (b) MWCNT-Ag

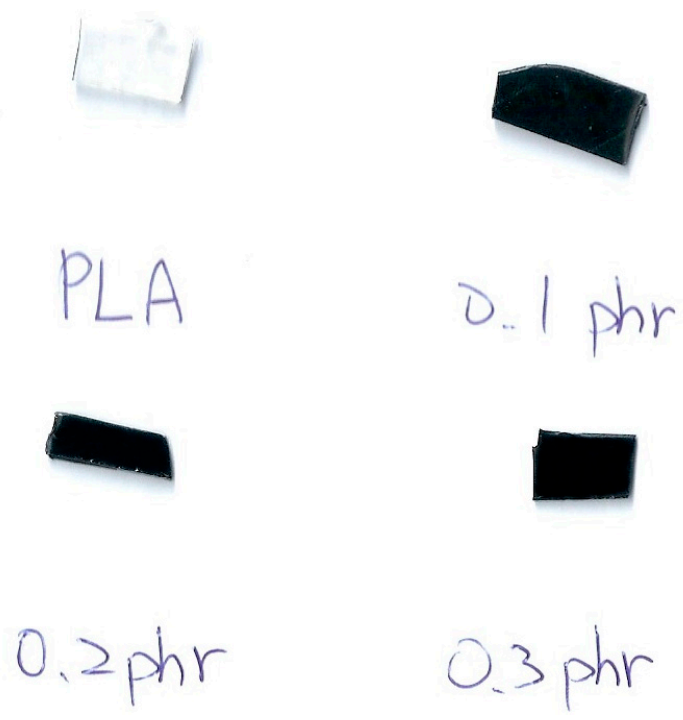

Figure S2. The color of PLA and PLA/MWCNT-Ag nanocomposites.

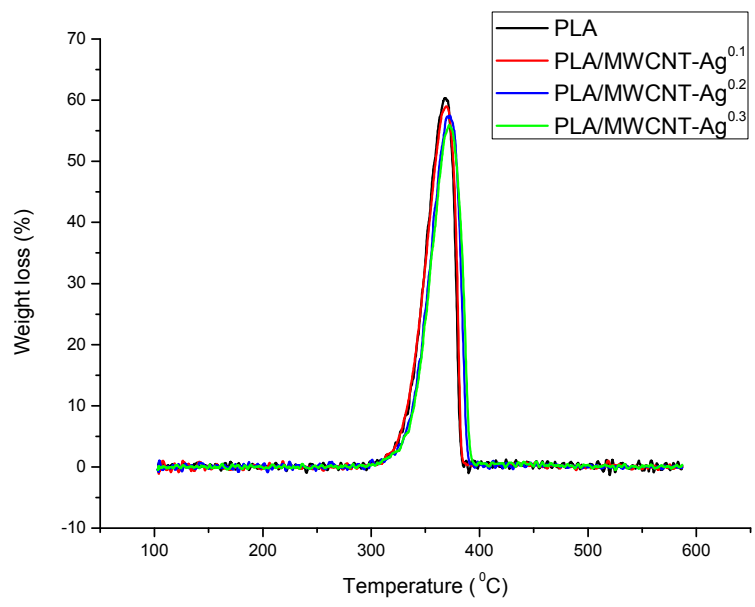

Figure S3. DTG curves of PLA and PLA/MWCNT-Ag nanocomposites.

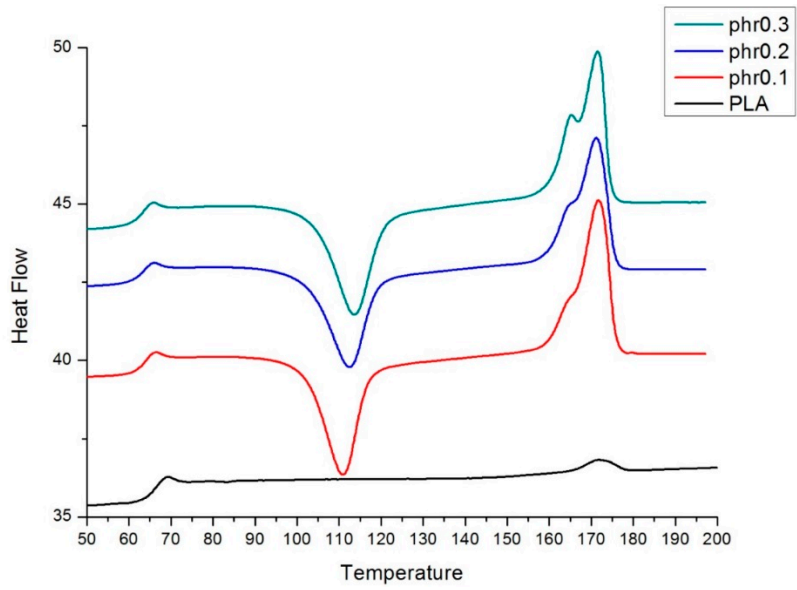

**Figure S4.** DSC curves of PLA and PLA/MWCNT-Ag nanocomposites.

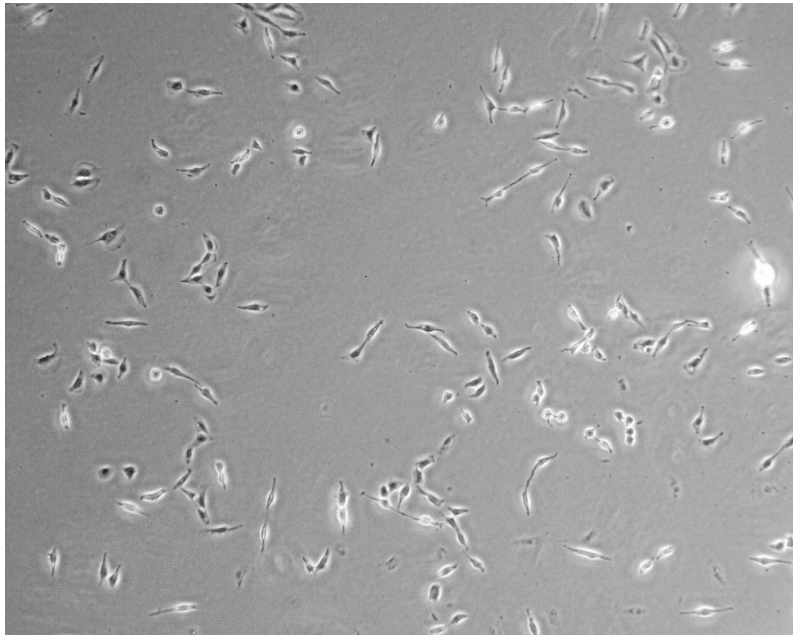

**Figure S5.** L929 fibroblasts cultured for control

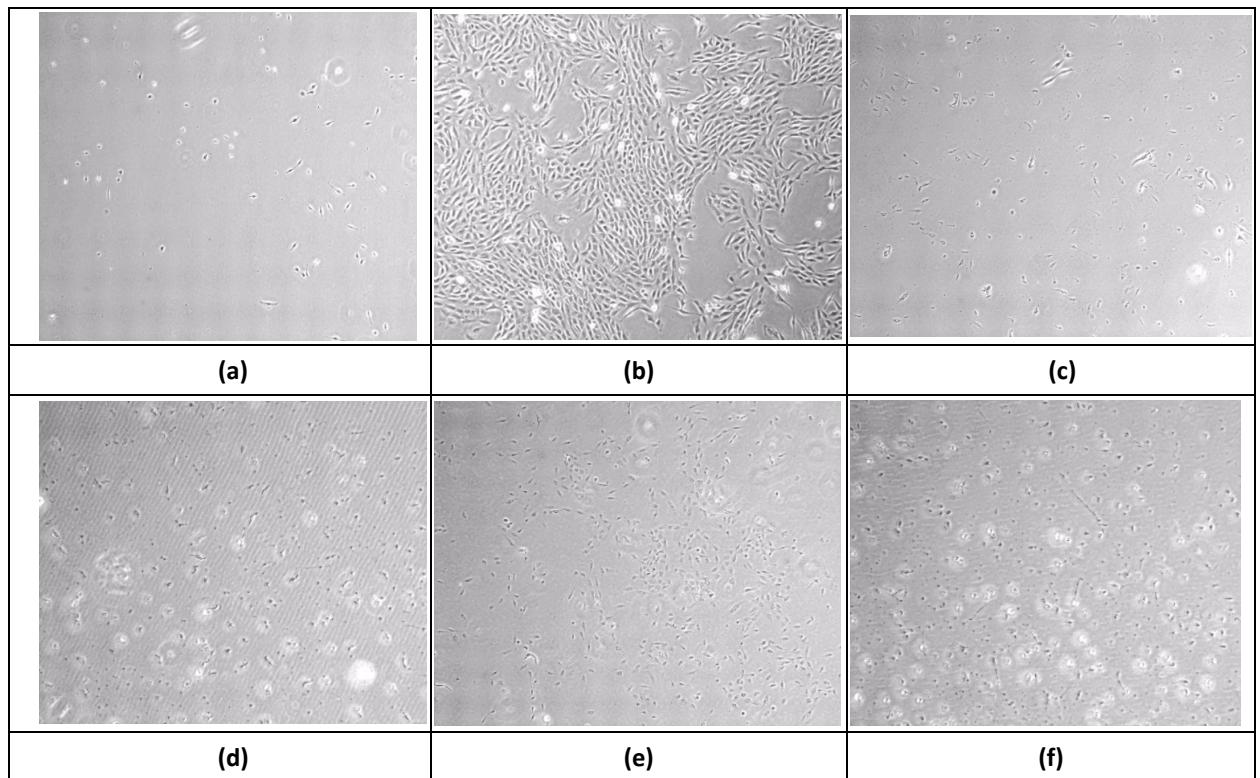

**Figure S6.** L929 fibroblasts cultured for **two days** with (a) positive control; (b) negative control; (c) PLA; (d) PLA/MWCNT-Ag<sup>0.1</sup>; (e) PLA/MWCNT-Ag<sup>0.2</sup>; and (f) PLA/MWCNT-Ag<sup>0.3</sup>.
